# Supplementary material
Source: publisher figshare collection journal article supplement (https://frontiersin.figshare.com/ndownloader/files/22088763)
Supplement: Supplementary file [file 22088763]

## Appendix

Consider a Recurrent Neural Network (RNN) whose state vector  $\mathbf{v}$  evolves according to:

$$\frac{dv_i}{dt} = -v_i + g_i \left( \sum_{j=1}^N w_{ij} v_j + I_i \right), \quad i = 1, \dots, N \quad (1)$$

where  $N$  is the number of neurons of the network and  $I_i$  is an external input to the  $i$ -th neuron. There is no restriction on the choice of the activation function  $g_i$  as long as it is monotone and differentiable [Pineda(1988)]. In the most general case, it is possible to define three different subsets of the network units:

- the subset  $I$  of input units;
- the subset  $O$  of output units;
- the subset  $H$  of hidden units.

The goal of the algorithm is to adjust the weights  $w_{ij}$  so that, for a given initial condition  $\mathbf{v}^0 = \mathbf{v}(t_0)$  and a given vector of input  $\mathbf{I}$ , the RNN (1) converges to a desired fixed point  $\mathbf{v}^\infty = \mathbf{v}(t_\infty)$ . This is obtained by minimizing a loss function  $E$  which measures the euclidean distance between the desired fixed point and the actual fixed point:

$$E = \frac{1}{2} \sum_{i=1}^N J_i^2 = \frac{1}{2} \sum_{i=1}^N (T_i - v_i^\infty)^2 \quad (2)$$

where  $T_i$  is the  $i$ -th desired output state component and  $J_i$  is the  $i$ -th component of the difference between the current fixed point  $v_i^\infty$  and the target point  $T_i$ . Observe that  $E$  depends on the weight matrix  $\mathbf{W}$  through the fixed point  $\mathbf{v}^\infty(\mathbf{W}, \mathbf{I})$ . Therefore, one way to drive the system to converge to a desired attractor is to let it evolve in the weight parameter space along trajectories which have opposite direction of the gradient of  $E$ :

$$\frac{dw_{ij}}{dt} = -\eta \frac{\partial E}{\partial w_{ij}}, \quad \eta > 0 \quad (3)$$

where  $\eta$  is the learning rate and must be small enough so that the state variable  $\mathbf{v}$  can always be considered to be at steady state [Pineda(1988)]. Computing now the derivatives in (3), one obtains

$$\frac{dw_{ij}}{dt} = -\eta \frac{\partial}{\partial w_{ij}} \left( \frac{1}{2} \sum_{k=1}^N J_k^2 \right) = -\eta \sum_{k=1}^N J_k \frac{\partial J_k}{\partial w_{ij}} = \eta \sum_{k=1}^N J_k \frac{\partial v_k^\infty}{\partial w_{ij}} \quad (4)$$

and the derivative of  $v_k^\infty$  with respect to  $w_{ij}$  is derived by observing that the fixed points of (1) must satisfy the nonlinear equation:

$$v_k^\infty = g_k \left( \sum_{s=1}^N w_{ks} v_s^\infty + I_k \right). \quad (5)$$

Differentiating (5) with respect to  $w_{ij}$  one obtains:

$$\frac{\partial v_k^\infty}{\partial w_{ij}} = g'_k(\hat{I}_k^\infty) \left[ \sum_{s=1}^N \frac{\partial w_{ks}}{\partial w_{ij}} v_s^\infty + \sum_{s=1}^N w_{ks} \frac{\partial v_s^\infty}{\partial w_{ij}} \right] \quad (6)$$

where  $\hat{I}_k^\infty = \left( \sum_{s=1}^N w_{ks} v_s^\infty + I_k \right)$ .

Solving (6) in terms of  $\frac{\partial v_k^\infty}{\partial w_{ij}}$  and defining  $L_{ks} = \delta_{ks} - g'_k(\hat{I}_k^\infty) w_{ks}$  where  $\delta_{ks}$  is the kronecker delta, it follows that:

$$\begin{cases} \sum_{s=1}^N L_{is} \frac{\partial v_s^\infty}{\partial w_{ij}} = g'_i(\hat{I}_i^\infty) v_j^\infty & k = i \\ \sum_{s=1}^N L_{ks} \frac{\partial v_s^\infty}{\partial w_{ij}} = 0 & k \neq i \end{cases} \quad (7)$$

and therefore for the generic  $k$ -th component

$$\frac{\partial v_k^\infty}{\partial w_{ij}} = L_{ki}^{-1} g'_i(\hat{I}_i^\infty) v_j^\infty \quad (8)$$

In conclusion, (3) simply becomes:

$$\frac{dw_{ij}}{dt} = \eta \left[ g'_i(\hat{I}_i^\infty) \sum_{k=1}^N J_k L_{ki}^{-1} \right] v_j^\infty. \quad (9)$$

Unfortunately, (9) requires the reciprocal of  $L_{ki}$  for computing the weights' update but, considering

$$y_i = g'_i(\hat{I}_i^\infty) \sum_{k=1}^N J_k L_{ki}^{-1} \quad (10)$$

one can avoid this process by introducing an associated dynamical system. Indeed, assuming that  $g'_i(\hat{I}_i^\infty) \neq 0 \forall \hat{I}_i^\infty \in \mathbb{R}$  and observing that  $L_{ki} = L_{ik}$  for construction, (10) is equivalent to:

$$\sum_{k=1}^N L_{ik}^{-1} J_k = \frac{y_i}{g'_i(\hat{I}_i^\infty)}. \quad (11)$$

Solving (11) in terms of  $J_k$  one obtains:

$$J_k = \sum_{i=1}^N L_{ik} \frac{y_i}{g'_i(\hat{I}_i^\infty)}. \quad (12)$$

Substituting now the explicit form for  $L_{ik}$ , (12) becomes:

$$0 = -y_k + g'_k(\hat{I}_k^\infty) \left( \sum_{i=1}^N w_{ik} y_i + J_k \right) \quad (13)$$

which can be seen as the steady state of the following side network:

$$\frac{dy_k}{dt} = -y_k + g'_k(\hat{I}_k^\infty) \left( \sum_{i=1}^N w_{ik} y_i + J_k \right). \quad (14)$$

Therefore, the system of differential equations is completely defined by:

$$\frac{dv_i}{dt} = -v_i + g_i \left( \sum_{j=1}^N w_{ij} v_j + I_i \right) \quad (15)$$

$$\frac{dy_k}{dt} = -y_k + g'_k(\hat{I}_k^\infty) \left( \sum_{i=1}^N w_{ik} y_i + J_k \right) \quad (16)$$

$$\frac{dw_{ij}}{dt} = \eta y_i^\infty v_j^\infty \quad (17)$$

Observe that, the weights' update is dependent on the corresponding fixed points of the first two equations.

## References

- [Pineda(1988)] Pineda, F. J. (1988). Generalization of back propagation to recurrent and higher order neural networks. In *Neural information processing systems*. 602–611
